# Supplementary material
Source: HighWire-hosted journal article supplement (https://srh.bmj.com/highwire/filestream/141746/field_highwire_adjunct_files/0/bmjsrh-2021-201081supp001_data_supplement.pdf)
Supplement: bmjsrh-2021-201081supp001_data_supplement.pdf [file bmjsrh-2021-201081supp001_data_supplement.pdf]

**Appendix 1.** Map of ten US states selected for survey and interview outreach, categorized by SRHR essential service designations and statewide actions to suspend abortion during the COVID-19 pandemic.

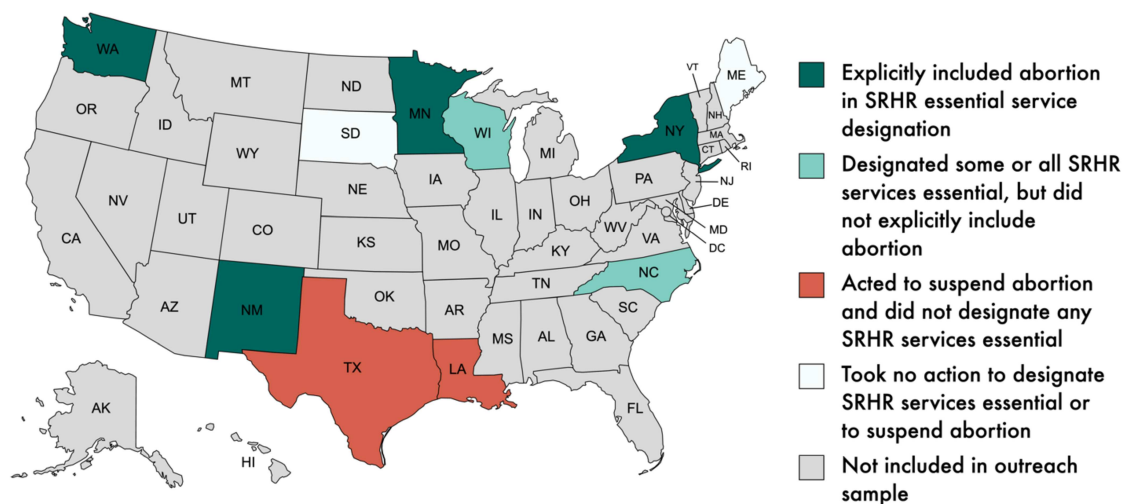

Created using MapChart  
<https://mapchart.net/index.html>

**Appendix 2.** List of US states categorized by SRHR essential service designations and statewide actions to suspend abortion.

| <b>Explicitly included abortion in SRHR essential service designation</b>                                                                           | <b>Designated some or all SRHR services essential, but did not explicitly include abortion</b> | <b>Acted to suspend abortion, but designated some SRHR services essential</b> | <b>Acted to suspend abortion and did not designate any SRHR services essential</b>                 | <b>Took no action to designate SRHR services essential or to suspend abortion</b>                                                                                                                                                                           |
|-----------------------------------------------------------------------------------------------------------------------------------------------------|------------------------------------------------------------------------------------------------|-------------------------------------------------------------------------------|----------------------------------------------------------------------------------------------------|-------------------------------------------------------------------------------------------------------------------------------------------------------------------------------------------------------------------------------------------------------------|
| Delaware<br>Hawaii<br>Illinois<br>Massachusetts<br>Minnesota<br>Montana<br>New Jersey<br>New Mexico<br>New York<br>Oregon<br>Virginia<br>Washington | California<br>Michigan<br>North Carolina<br>Utah<br>Wisconsin                                  | Indiana<br>Ohio<br>Tennessee<br>West Virginia                                 | Alabama<br>Alaska<br>Arkansas<br>Iowa<br>Kentucky<br>Louisiana<br>Mississippi<br>Oklahoma<br>Texas | Arizona<br>Colorado<br>Connecticut<br>Florida<br>Georgia<br>Idaho<br>Kansas<br>Maine<br>Maryland<br>Missouri<br>Nebraska<br>Nevada<br>New Hampshire<br>North Dakota<br>Pennsylvania<br>Rhode Island<br>South Carolina<br>South Dakota<br>Vermont<br>Wyoming |
